# Supplementary material
Source: PubMed Central journal article supplement (PMC3218119)
Supplement: NIHMS326054-supplement-1.pdf [file NIHMS326054-supplement-1.pdf]

**Appendix.**

**Table 1. Association Between Ancestral Proportion and Genotypes of Preterm Birth-Related Candidate SNPs**

| <b>Gene</b>    | <b>Z</b> | <b>P</b> |
|----------------|----------|----------|
| <i>CYP11A1</i> | -0.10    | 0.92     |
| <i>GSTT1</i>   | 0.14     | 0.89     |

Tsai H-J, Hong X, Chen J, Liu X, Pearson C, Ortiz K et al. Role of African ancestry and gene-environment interactions in predicting preterm birth. *Obstet Gynecol* 2011;118.

The authors provided this information as a supplement to their article.

**Table 2. Major Risk Factors of Preterm Birth (PTB)<sup>\*</sup>, Spontaneous PTB, and Indicated PTB in Black Mothers<sup>†</sup> at the Boston Medical Center**

|                               | Preterm Birth |           |                      | Spontaneous Preterm Birth |           |                      | Indicated Preterm Birth |           |          |
|-------------------------------|---------------|-----------|----------------------|---------------------------|-----------|----------------------|-------------------------|-----------|----------|
|                               | OR            | 95% CI    | <i>P</i>             | OR                        | 95% CI    | <i>P</i>             | OR                      | 95% CI    | <i>P</i> |
| Epidemiologic factors         |               |           |                      |                           |           |                      |                         |           |          |
| Smoking                       | 1.33          | 1.08-1.64 | 7 x 10 <sup>-3</sup> | 1.38                      | 1.12-1.70 | 2 x 10 <sup>-3</sup> | 0.96                    | 0.74-1.25 | 0.76     |
| Illicit drug use              | 1.48          | 0.97-2.25 | 0.07                 | 1.35                      | 0.89-2.04 | 0.15                 | 1.13                    | 0.67-1.89 | 0.65     |
| Overall stress                | 1.30          | 1.06-1.60 | 0.01                 | 1.20                      | 0.96-1.49 | 0.11                 | 1.19                    | 0.91-1.56 | 0.21     |
| Genetic ancestry              |               |           |                      |                           |           |                      |                         |           |          |
| Ancestry <sup>‡</sup>         | 1.11          | 1.02-1.20 | 0.01                 | 1.10                      | 1.00-1.21 | 0.04                 | 1.05                    | 0.94-1.17 | 0.43     |
| Gene-environment interactions |               |           |                      |                           |           |                      |                         |           |          |
| <i>CYP1A1</i> <sup>§</sup>    | 1.01          | 0.70-1.45 | 0.96                 | 1.24                      | 0.86-1.78 | 0.25                 | 0.69                    | 0.42-1.14 | 0.15     |
| <i>CYP1A1</i> x smoking       | 1.83          | 1.20-2.81 | 5 x 10 <sup>-3</sup> | 1.63                      | 1.14-2.32 | 7 x 10 <sup>-3</sup> | 1.06                    | 0.68-1.66 | 0.80     |
| <i>GSTT1</i> <sup>  </sup>    | 0.78          | 0.53-1.16 | 0.23                 | 1.02                      | 0.68-1.50 | 0.94                 | 0.61                    | 0.34-1.09 | 0.10     |
| <i>GSTT1</i> x smoking        | 1.28          | 0.81-2.03 | 0.28                 | 1.54                      | 1.00-2.39 | 0.05                 | 0.63                    | 0.29-1.38 | 0.25     |

OR, odds ratio.

Tsai H-J, Hong X, Chen J, Liu X, Pearson C, Ortiz K et al. Role of African ancestry and gene-environment interactions in predicting preterm birth. *Obstet Gynecol* 2011;118.

The authors provided this information as a supplement to their article.

\* PTB: preterm birth with gestational age less than 37 weeks.

† Based on self-reported Black race.

‡ Ancestry is defined as African ancestry proportion and OR is expressed for each 10% increment of African ancestry.

§ *CYP11A1* (AA) as the reference group.

|| *GSTT1* (present) as the reference group.

Tsai H-J, Hong X, Chen J, Liu X, Pearson C, Ortiz K et al. Role of African ancestry and gene-environment interactions in predicting preterm birth. *Obstet Gynecol* 2011;118.

The authors provided this information as a supplement to their article.

**Table 3. Major Risk Factors of Indicated Preterm Birth in Black Mothers\* at the Boston Medical Center**

|                | <b>OR</b> | <b>95% CI</b> | <b>P</b> |
|----------------|-----------|---------------|----------|
| Maternal age   | 1.26      | 1.09-1.44     | 0.001    |
| BMI            | 1.22      | 1.01-1.48     | 0.04     |
| Parity         | 0.75      | 0.61-0.92     | 0.006    |
| Overall stress | 1.13      | 1.00-1.28     | 0.05     |

OR, odds ratio; BMI, body mass index.

\* Based on self-reported black race.

Tsai H-J, Hong X, Chen J, Liu X, Pearson C, Ortiz K et al. Role of African ancestry and gene-environment interactions in predicting preterm birth. *Obstet Gynecol* 2011;118.

The authors provided this information as a supplement to their article.

**Table 4. Evaluation of Sequential Predictive Models of Preterm Birth (PTB)<sup>\*</sup>, Spontaneous PTB and indicated PTB in Black Mothers<sup>†</sup>, Using Receiver Operating Characteristic Curve Analysis and Area Under Curve Analysis**

| Model   | Covariates in the Model                                                                                | c Statistic (95% CI) |           |                           |           |                         |           |
|---------|--------------------------------------------------------------------------------------------------------|----------------------|-----------|---------------------------|-----------|-------------------------|-----------|
|         |                                                                                                        | Preterm Birth        |           | Spontaneous Preterm Birth |           | Indicated Preterm Birth |           |
| Model 1 | Epidemiological variables only <sup>‡</sup>                                                            | 0.58                 | 0.52-0.63 | 0.58                      | 0.53-0.63 | 0.52                    | 0.47-0.57 |
| Model 2 | Model 1 + ancestry                                                                                     | 0.62                 | 0.57-0.67 | 0.62                      | 0.57-0.67 | 0.55                    | 0.50-0.60 |
| Model 3 | Model 1+ <i>CYP1A1</i> + <i>CYP1A1</i> *smoking + <i>GSTT1</i> + <i>GSTT1</i> *smoking                 | 0.61                 | 0.56-0.66 | 0.56                      | 0.51-0.61 | 0.53                    | 0.48-0.58 |
| Model 4 | Model 1+ <i>CYP1A1</i> + <i>CYP1A1</i> *smoking + <i>GSTT1</i> + <i>GSTT1</i> *smoking only + ancestry | 0.65                 | 0.60-0.70 | 0.62                      | 0.57-0.67 | 0.57                    | 0.52-0.62 |

<sup>\*</sup> PTB: preterm birth with gestational age <37 weeks.

<sup>†</sup> Based on self-reported Black race.

<sup>‡</sup> Covariates included in model 1 are smoking, illicit drug use and overall stress.

Tsai H-J, Hong X, Chen J, Liu X, Pearson C, Ortiz K et al. Role of African ancestry and gene-environment interactions in predicting preterm birth. *Obstet Gynecol* 2011;118.

The authors provided this information as a supplement to their article.

**Table 5. Area Under Curve for Each Predictive Model Shown in Supplemental Table 4 and Pairwise *P*-Values for Model Comparisons of Preterm Birth (PTB)<sup>\*</sup>, Spontaneous PTB and Indicated PTB in Black Mothers<sup>†</sup>**

| <b>Preterm birth</b>             |                   |                   |                   |                   |
|----------------------------------|-------------------|-------------------|-------------------|-------------------|
|                                  | <b>Model 1</b>    | <b>Model 2</b>    | <b>Model 3</b>    | <b>Model 4</b>    |
| Model 1                          | 0.58 <sup>‡</sup> |                   |                   |                   |
| Model 2                          | 0.09 <sup>§</sup> | 0.62 <sup>‡</sup> |                   |                   |
| Model 3                          | 0.09              | 0.78              | 0.61 <sup>‡</sup> |                   |
| Model 4                          | 0.002             | 0.05              | 0.02              | 0.65 <sup>‡</sup> |
| <b>Spontaneous preterm birth</b> |                   |                   |                   |                   |
| Model 1                          | 0.58 <sup>‡</sup> |                   |                   |                   |
| Model 2                          | 0.12              | 0.62 <sup>‡</sup> |                   |                   |
| Model 3                          | 0.20              | 0.0008            | 0.56 <sup>‡</sup> |                   |
| Model 4                          | 0.06              | 0.72              | 0.001             | 0.62 <sup>‡</sup> |
| <b>Indicated preterm birth</b>   |                   |                   |                   |                   |
| Model 1                          | 0.52 <sup>‡</sup> |                   |                   |                   |
| Model 2                          | 0.04              | 0.55 <sup>‡</sup> |                   |                   |
| Model 3                          | 0.68              | 0.61              | 0.53 <sup>‡</sup> |                   |
| Model 4                          | 0.19              | 0.66              | 0.009             | 0.57 <sup>‡</sup> |

<sup>\*</sup> PTB: preterm birth with gestational age less than 37 weeks.

<sup>†</sup> Based on self-reported black race.

<sup>‡</sup>The values in the diagonal were the area under curve for each predictive model.

Tsai H-J, Hong X, Chen J, Liu X, Pearson C, Ortiz K et al. Role of African ancestry and gene-environment interactions in predicting preterm birth. *Obstet Gynecol* 2011;118.

The authors provided this information as a supplement to their article.

<sup>§</sup>The values in the off-diagonal were the *P*-values for testing the equality of the area under curve.

Tsai H-J, Hong X, Chen J, Liu X, Pearson C, Ortiz K et al. Role of African ancestry and gene-environment interactions in predicting preterm birth. *Obstet Gynecol* 2011;118.

The authors provided this information as a supplement to their article.

**Table 6. Evaluation of Sequential Predictive Models of Indicated Preterm Birth in Black Mothers<sup>\*</sup>, Using Receiver Operating Characteristic Curve Analysis and Area Under Curve Analysis**

| Model   | Covariates in the Model                                                                                | <i>c</i> Statistic (95% CI) for Indicated Preterm Birth <sup>†</sup> |           |
|---------|--------------------------------------------------------------------------------------------------------|----------------------------------------------------------------------|-----------|
| Model 1 | Epidemiological variables only <sup>†</sup>                                                            | 0.56                                                                 | 0.51–0.61 |
| Model 2 | Model 1 + ancestry                                                                                     | 0.56                                                                 | 0.51–0.61 |
| Model 3 | Model 1+ <i>CYP1A1</i> + <i>CYP1A1</i> *smoking + <i>GSTT1</i> + <i>GSTT1</i> *smoking                 | 0.57                                                                 | 0.52–0.62 |
| Model 4 | Model 1+ <i>CYP1A1</i> + <i>CYP1A1</i> *smoking + <i>GSTT1</i> + <i>GSTT1</i> *smoking only + ancestry | 0.60                                                                 | 0.55–0.65 |

<sup>\*</sup> Based on self-reported black race.

<sup>†</sup> Covariates included in model 1 are maternal age, body mass index, parity and overall stress.

<sup>‡</sup> Test the equality of the area under curve: Model 1 (m1) vs. Model 2 (m2), *P*=0.09; m1 vs. m3, *P*=0.52; m1 vs. m4, *P*=0.13; m2 vs. m3, *P*=0.65; m2 vs. m4, *P*=0.17; m3 vs. m4, *P*=0.02.

Tsai H-J, Hong X, Chen J, Liu X, Pearson C, Ortiz K et al. Role of African ancestry and gene-environment interactions in predicting preterm birth. *Obstet Gynecol* 2011;118.

The authors provided this information as a supplement to their article.



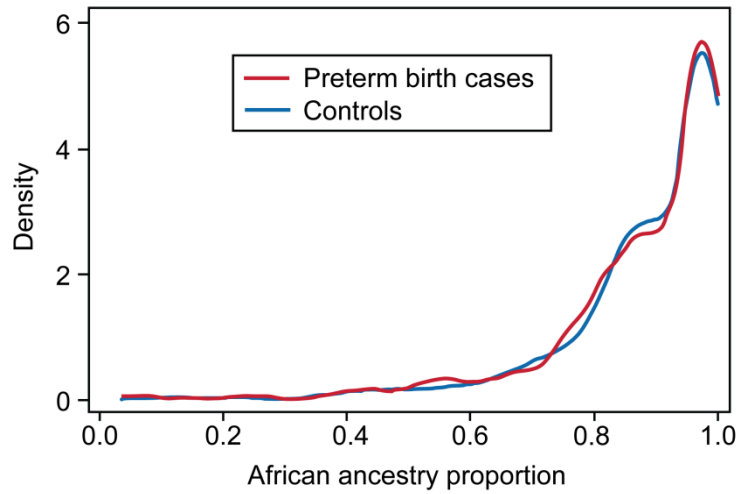

Figure 1. Distribution of African ancestry proportion between preterm cases and controls.

Tsai H-J, Hong X, Chen J, Liu X, Pearson C, Ortiz K et al. Role of African ancestry and gene-environment interactions in predicting preterm birth. *Obstet Gynecol* 2011;118.

The authors provided this information as a supplement to their article.
